42. Donahue MJ, Lu H, Jones CK, Pekar JJ, van Zijl PC: An account of the discrepancy between MRI and PET cerebral blood flow measures. A high-field MRI investigation. *NMR Biomed* 2006; 19:1043–54
43. Günther M, Bock M, Schad LR: Arterial spin labeling in combination with a look-locker sampling strategy: Inflow turbo-sampling EPI-FAIR (ITS-FAIR). *Magn Reson Med* 2001; 46:974–84
44. Wintermark M, Sesay M, Barbier E, Borbély K, Dillon WP, Eastwood JD, Glenn TC, Grandin CB, Pedraza S, Soustiel JF, Nariai T, Zaharchuk G, Caillé JM, Dousset V, Yonas H: Comparative overview of brain perfusion imaging techniques. *J Neuroradiol* 2005; 32:294–314
45. van Gelderen P, de Zwart JA, Duyn JH: Pitfalls of MRI measurement of white matter perfusion based on arterial spin labeling. *Magn Reson Med* 2008; 59:788–95
46. van Osch MJ, Teeuwisse WM, van Walderveen MA, Hendrikse J, Kies DA, van Buchem MA: Can arterial spin labeling detect white matter perfusion signal? *Magn Reson Med* 2009; 62:165–73

## ANESTHESIOLOGY REFLECTIONS FROM THE WOOD LIBRARY-MUSEUM

### Wood-swinging Paul Wood, M.D.: “Tee or Tea?”

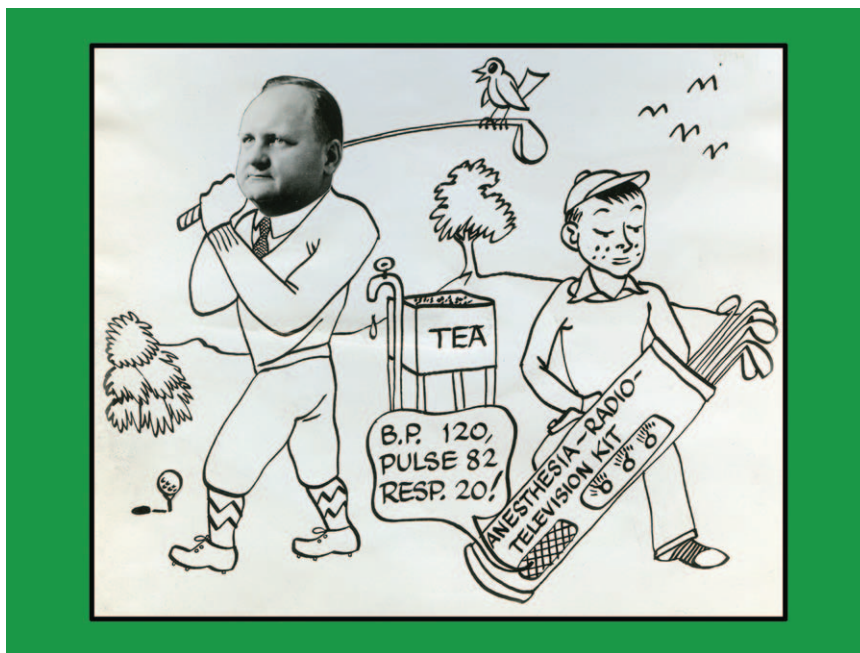

Like many of the relatively flat Midwestern states, Indiana hosts a large number of public and private golf courses. The cartoon (*above*) features the Hoosier founder of the Wood Library-Museum, Paul Wood, as an overly deliberate duffer whose shouldered golf club has become a bird's perch near the golf course's tea stand. Wood's caddy appears to be falling asleep (anesthetized?) while carrying the anesthesiologist's golf bag—a bag which is relaying a mythical patient's vital signs from the operating room. Perhaps the cartoonist was encouraging Paul Wood to abandon the golf tee and to stick with sipping tea.... (Copyright © the American Society of Anesthesiologists, Inc.)

George S. Bause, M.D., M.P.H., Honorary Curator, ASA's Wood Library-Museum of Anesthesiology, Park Ridge, Illinois, and Clinical Associate Professor, Case Western Reserve University, Cleveland, Ohio. UJYC@aol.com.
